# Supplementary material
Source: ML conference proceedings conference paper supplement (https://openaccess.thecvf.com/content/CVPR_2019/html/He_Parametric_Noise_Injection_CVPR_2019_paper.html)
Supplement: Supplementary file 1 [file He_Parametric_Noise_Injection_CVPR_2019_supplemental.pdf]

# Parametric Noise Injection: Trainable Randomness to Improve Deep Neural Network Robustness against Adversarial Attack

## Supplementary Materials

### A MNIST Result:

White-Box attack summary for MNIST data set is provided in Table 1. We report clean Lenet5 architecture training, adversarial training, and results from different version of PNI.

Table 1. White-Box attack summary for MNIST

| Model                            | Clean Test Accuracy (%) | PGD (%) | FGSM (%) |
|----------------------------------|-------------------------|---------|----------|
| Clean                            | 99.22                   | 0.6     | 5.22     |
| Adv. Training                    | 98.84                   | 94.75   | 95.50    |
| PNI during inference             |                         |         |          |
| PNI-W+A-a                        | 98.83                   | 94.75   | 96.02    |
| PNI-W                            | 98.59                   | 94.99   | 95.57    |
| PNI-A-a                          | 98.67                   | 94.65   | 95.83    |
| Without PNI during the inference |                         |         |          |
| PNI-W+A-a                        | 98.53                   | 94.15   | 95.52    |
| PNI-W                            | 98.60                   | 93.81   | 95.23    |
| PNI-A-a                          | 98.83                   | 94.55   | 96.28    |

The simulations for MNIST is less significant as it is a small gray-scale dataset. The results do not show significant improvement as adversarial training already achieved a higher accuracy in defending MNIST. However, PNI-W still manages to improve the accuracy close to 95 %. Since the Lenet5 is a small architecture the effect of PNI will be small as well.

### B Substitute Model Attack:

We conduct the first black box attack using substitute model. We first train a substitute model using Alexnet which performs the exact same classification task as the target model. As a result the clean test accuracy of both the target and substitute model is almost similar in Table 2.

Table 2. Black-Box attack results using Alexnet as the substitute model

| Target Model  | Target Clean Accuracy (%) | Substitute Clean Accuracy (%) | Attack Accuracy (%) |
|---------------|---------------------------|-------------------------------|---------------------|
| Adv. Training | 87.49                     | 86.49                         | 84.89               |
| PNI-W+A-a     | 84.79                     | 84.90                         | 83.54               |
| PNI-W         | 85.02                     | 85.07                         | 83.12               |
| PNI-A-a       | 85.50                     | 85.75                         | 83.57               |

In case of substitute model for all the cases of PNI we had the noise at the inference. Our black box attack accuracy is similar as our baseline 83 %. However, the little degradation we observed is mainly due to the sacrifice in clean test data accuracy of the target model.

### C More Results:

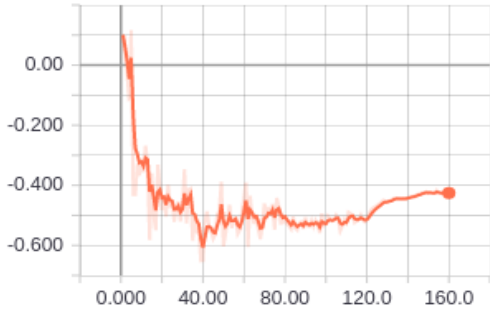

a) Convergence of Alpha in the First Convolutional Layer PNI-W

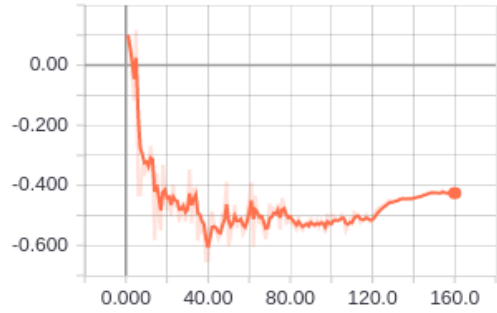

b) Convergence of Alpha in the First Convolutional Layer PNI-W+A-a

Figure 1: Convergence of the trainable parameter is almost Identical for both PNI-W and PNI-W+A-a.

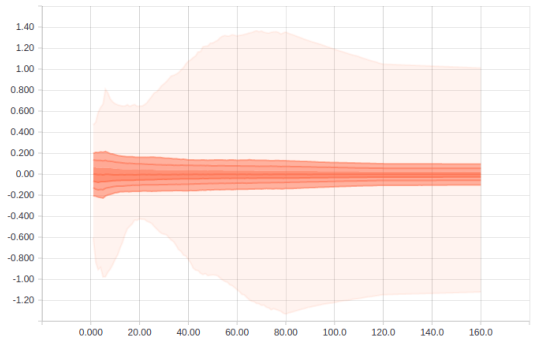

PNI-W

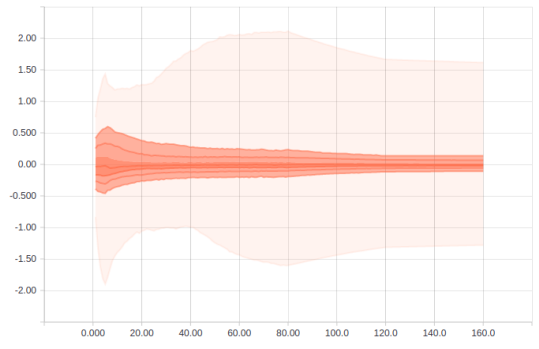

Vanilla-Resnet with Adversarial training

Figure 2: Change in weight distribution for Resnet-20 in first convolution layer. Indicating that PNI performs regularization by changing the weight distribution.

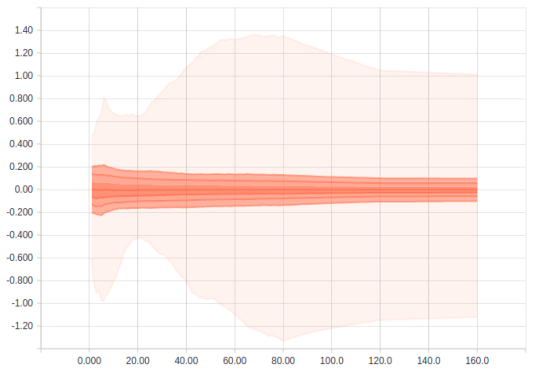

PNI-W

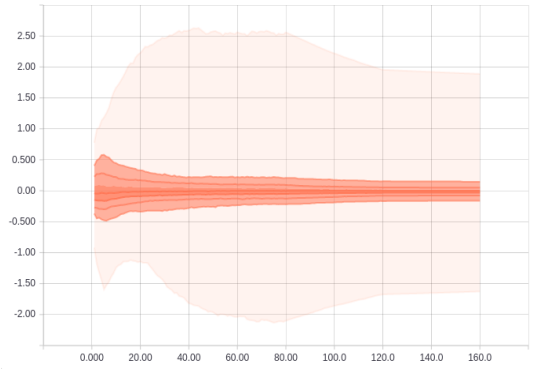

PNI-W+A-a

Figure 3: Change in weight distribution for Resnet-20 in first convolution layer. Indicating that PNI-W performs regularization more effectively by shrinking the weight distribution. While the weight distribution is relatively scattered for PNI-W+A-a

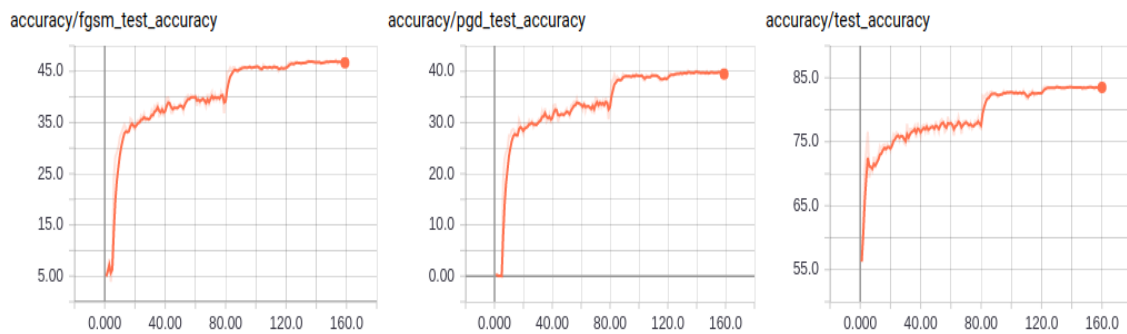

### Vanilla Resnet Adversarial Train

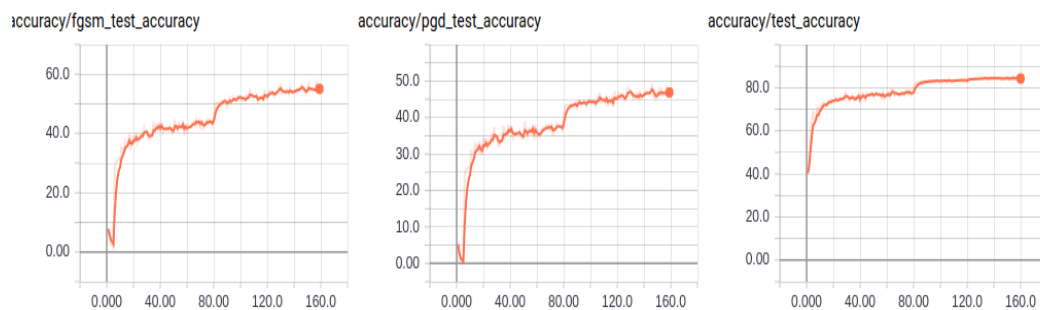

### PNI-W

Figure 4: FGSM, PGD and Test accuracy log for Vanilla-Resnet and PNI-W.
